# Supplementary material
Source: PubMed Central journal article supplement (PMC8033611)
Supplement: pt0c00189_si_001.pdf [file pt0c00189_si_001.pdf]

## Supporting information

### **Serotonin 2A receptor (5-HT<sub>2A</sub>R) activation by 25H-NBOMe positional isomers: in vitro functional evaluation and molecular docking**

*Eline Pottie<sup>1</sup>, Olga V. Kupriyanova<sup>2,3</sup>, Asher L. Brandt<sup>4</sup>, Robert B. Laprairie<sup>4,5</sup>, Vadim A. Shevyrin<sup>6</sup>, Christophe P. Stove<sup>1\*</sup>*

<sup>1</sup> Laboratory of Toxicology, Department of Bioanalysis, Faculty of Pharmaceutical Sciences, Ghent University, Campus Heymans, Ottergemsesteenweg 460, B-9000 Ghent, Belgium

<sup>2</sup> Institute of Fundamental Medicine and Biology, Kazan (Volga Region) Federal University, Kazan, Russian Federation

<sup>3</sup> Kazan State Medical University, Kazan, Russian Federation

<sup>4</sup> College of Pharmacy and Nutrition, University of Saskatchewan, Saskatoon, Saskatchewan, Canada

<sup>5</sup> Department of Pharmacology, College of Medicine, Dalhousie University, Halifax, Nova Scotia, Canada

<sup>6</sup> Ural Federal University, Institute of Chemistry and Technology, Ekaterinburg, Russian Federation

\* Corresponding Author: Christophe Stove, Laboratory of Toxicology, Department of Bioanalysis, Faculty of Pharmaceutical Sciences, Ghent University, Ottergemsesteenweg 460, 9000 Ghent, Belgium, Phone: +32 9 264 81 35, Fax: +32 9 264 81 83, E-mail: [christophe.stove@ugent.be](mailto:christophe.stove@ugent.be)

## **CONTENT**

**Figure S1**                      **Visual representation of the docking of 25CN-NBOH and 23H-, 25H-, 26H-, and 34H-NBOMe in the binding pocket of the 5-HT<sub>2A</sub>R.**

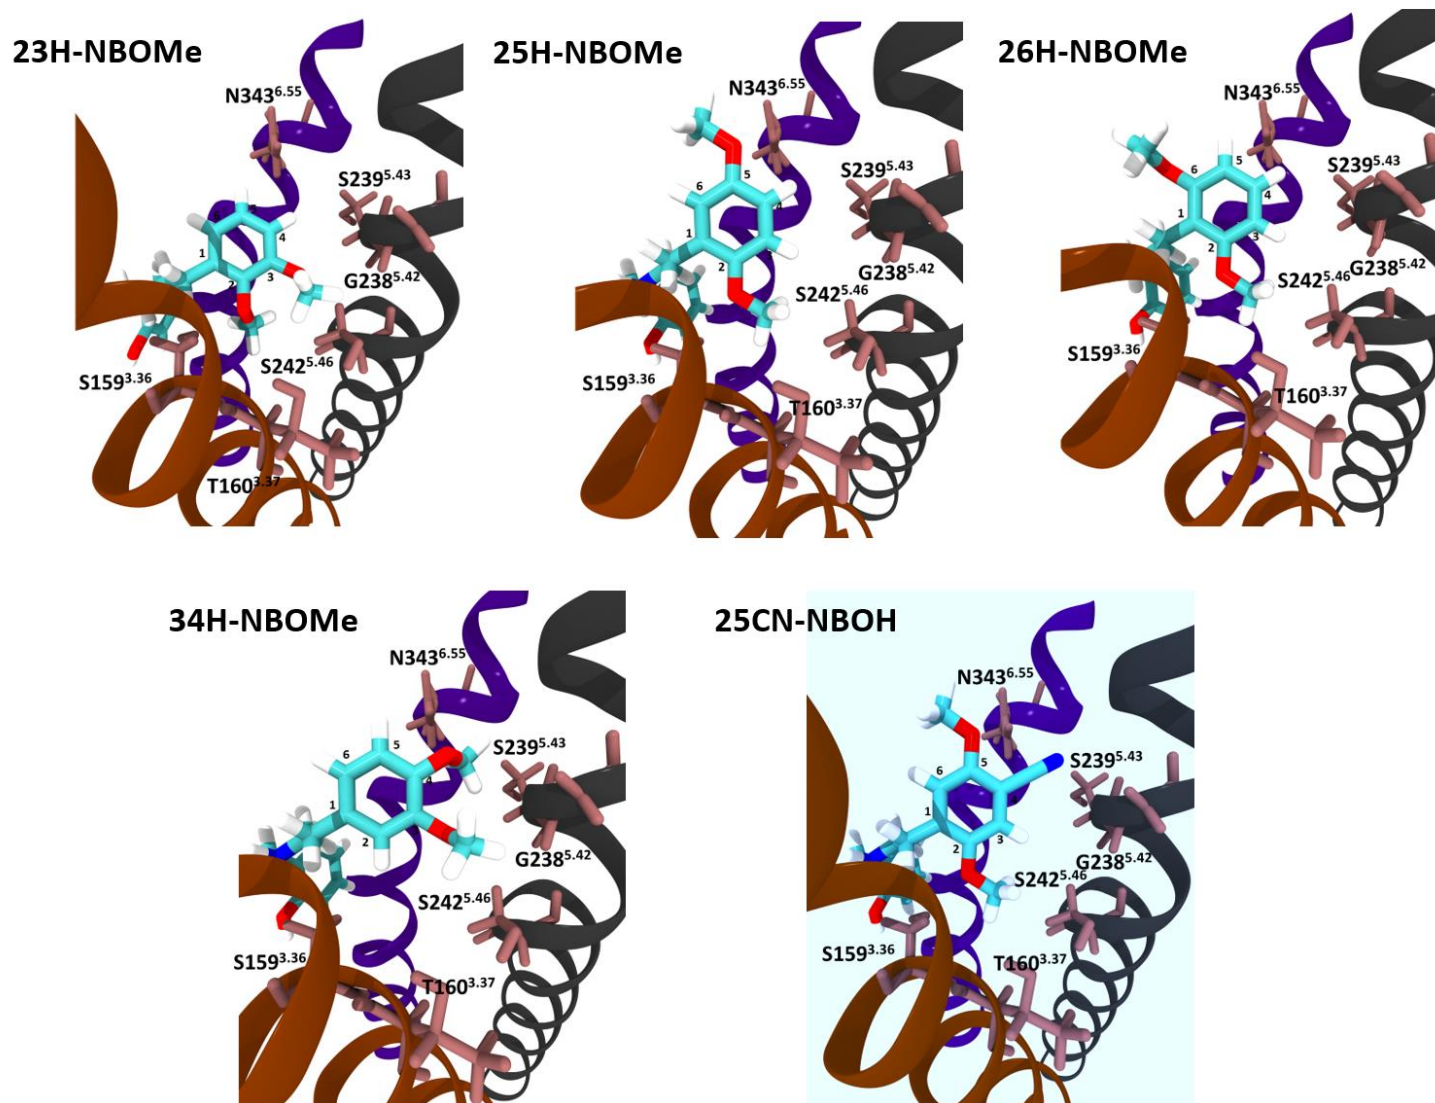

**Figure S1:** Visual representation of the docking of 25CN-NBOH, and 23H-, 25H-, 26H-, and 34H-NBOMe in the binding pocket of the 5-HT<sub>2A</sub>R (PDB: 6WHA)<sup>1</sup>. The specified residues are those specifically hypothesized to interact with the specific methoxy groups on the phenyl group of the phenethylamine moiety.

## REFERENCE

1. Kim, K.; Che, T.; Panova, O.; DiBerto, J. F.; Lyu, J.; Krumm, B. E.; Wacker, D.; Robertson, M. J.; Seven, A. B.; Nichols, D. E.; Shoichet, B. K.; Skiniotis, G.; Roth, B. L., Structure of a Hallucinogen-Activated Gq-Coupled 5-HT<sub>2A</sub> Serotonin Receptor. *Cell* **2020**, 182 (6), 1574-1588 e19.
